# Supplementary material
Source: MDPI journal article supplement (https://www.mdpi.com/2072-4292/9/7/645)
Supplement: s1 [file s1]

# Supplementary Materials: Location- and Time-Specific Hydrological Simulations with Multi-Resolution Remote Sensing Data in Urban Areas

Charlotte Wirion \*, Willy Bauwens and Boud Verbeiren

**Table S1.** Calibrated WetSpa parameters.

| WetSpa Parameters | Value                |
|-------------------|----------------------|
| kep               | 0.75                 |
| krun              | 24.67                |
| Pmax              | 10.00                |
| kss               | −0.43                |
| ki                | 0.83                 |
| g0                | 1000.00              |
| gmax              | 1050.00              |
| kg                | $5.3 \times 10^{-5}$ |

**Table S2.** User input file for WetSpa.

```

timestep = '1 h'
# would you like to use the default manning values? (min = 0.025; max = 0.055)
defaultManning = 'N'
# if not, set your own values:
minManning = 0.01
maxManning = 0.055
# 3 options are available for Manning coefficient calculation, choose one of them (see
manual)
ManningOption = '1'
# for option 3 you need a default manning value:
ManningValue = 0
# do you want to calculate the runoff coefficient based on an imperviousness map?
#(if yes, make sure your imperviousness map is saved in the folder basic_maps as
"imperviousness_start")
imp_map = 'N'
# if not, what is the value of imperviousness in your urban cells?
imp_value = 0.95
# parameters for depression capacity calculation (see manual for more details)
b = 9.5
Sdu = 0.5
# would you like to use the default thresholds for the calculation of velocity?
# (defaults: min = 0.001, max = 3.0)
defaultVelocity = 'Y'
# if not, set your own:
minVelocity = 0.001
maxVelocity = 1
# parameters for flow direction calculation (in order to remove false depressions)
Core_Depth = 80000
Core_Volume = 80000
Core_Area = 80000
Catchment_Precipitation = 80000
# threshold to derive the stream network from the flow accumulation
Stream_threshold = 200

```

```

# would you like to set a min threshold for the slope map calculation?
Slope_min = 'Y'
# if so, what is the value of your threshold?
Slope_threshold = 0.03
# would you like to create a map that visualize the region with slope< slope_threshold?
Slope_threshold_map = 'Y'
# return period for hydraulic radius calculation (choices: t2, t10, t100)
return_period = 't10'
# threshold to derive the sub-catchments form the flow accumulation
Subcatchment_threshold = 30000
#parameters for Initial Soil Moisture calculation
Smin = 0.1
Smax = 1.0
# special case (Vcatchment)
Vcatchment = 'N'

```

**Table S3.** List of Proba-V images.

| ProbaV image  | Date             | Use                                 |
|---------------|------------------|-------------------------------------|
| ProbaV TOC S5 | 6 March 2015     | seasonal LAI maps                   |
| ProbaV TOC S5 | 11 April 2015    | ground-truthing                     |
| ProbaV TOC S5 | 16 April 2015    | ground-truthing                     |
| ProbaV TOC S5 | 21 April 2015    | ground-truthing                     |
| ProbaV TOC S5 | 26 April 2015    | ground-truthing & seasonal LAI maps |
| ProbaV TOC S5 | 1 June 2015      | ground-truthing & seasonal LAI maps |
| ProbaV TOC S5 | 11 June 2015     | ground-truthing & seasonal LAI maps |
| ProbaV TOC S5 | 1 July 2015      | ground-truthing Apex image          |
| ProbaV TOC S5 | 11 July 2015     | ground-truthing & seasonal LAI maps |
| ProbaV TOC S5 | 1 August 2015    | ground-truthing                     |
| ProbaV TOC S5 | 26 August 2015   | ground-truthing & seasonal LAI maps |
| ProbaV TOC S5 | 1 October 2015   | ground-truthing & seasonal LAI maps |
| ProbaV TOC S5 | 21 November 2015 | seasonal LAI maps                   |
